# Supplementary figures and images for: A bifunctional dermaseptin–thanatin dipeptide functionalizes the crop surface for sustainable pest management
Source: Royal Society of Chemistry journal article supplement (doi:10.1039/c9gc00457b), 2019-01-01

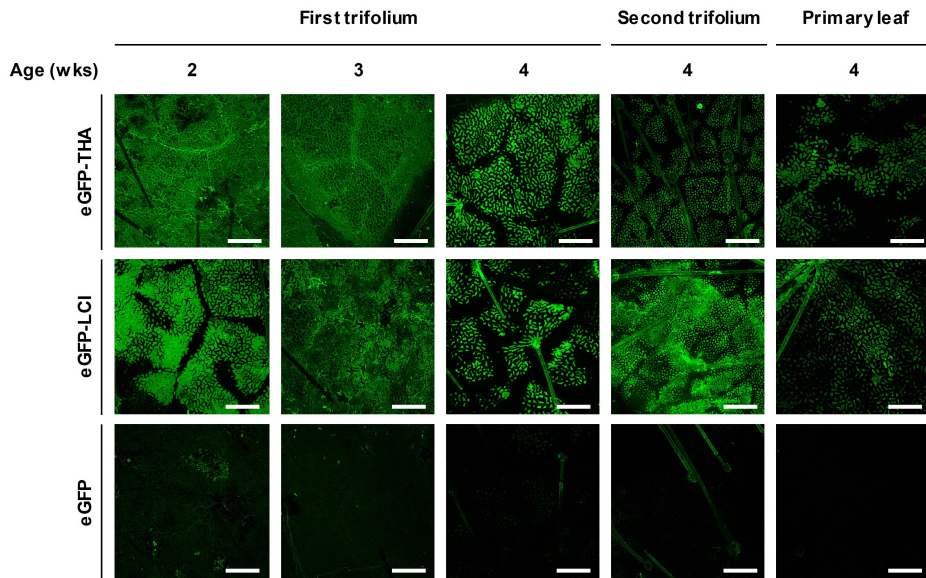

Supplement: c9gc00457b2.pdf [file c9gc00457b2.pdf]

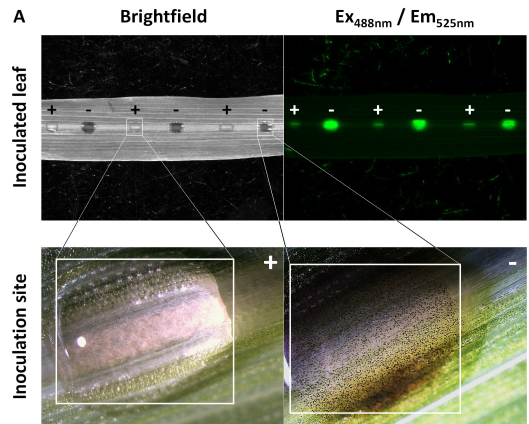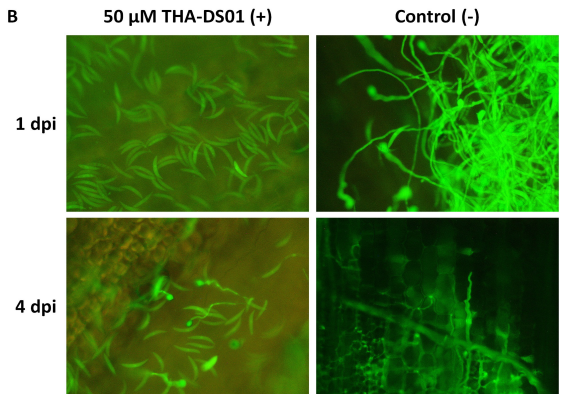

Supplement: c9gc00457b5.pdf [file c9gc00457b5.pdf]

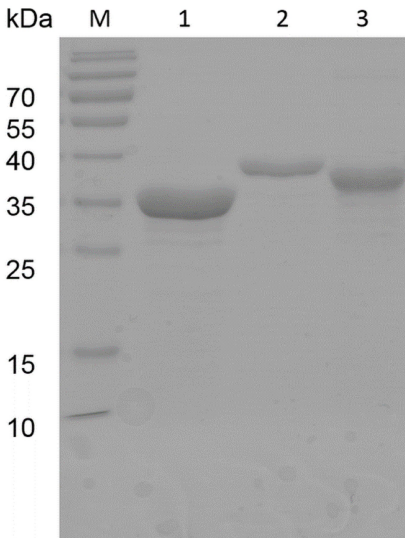

Supplement: c9gc00457b6.pdf [file c9gc00457b6.pdf]
